# Supplementary material for: Normal organ dosimetry for thyroid cancer patients treated with radioiodine as part of the multi-centre multi-national Horizon 2020 MEDIRAD project
Source: Springer Nature journal article supplement (doi:10.1007/s00259-023-06295-0), 2023-06-10
Supplement: MOESM1 [file 25472178]

## Supplementary material:

### Taprogge et al: Normal organ dosimetry for thyroid cancer patients treated with radioiodine as part of the multi-centre multi-national MEDIRAD project

Supplementary Table 1: Ethics approval WP3

| <i>Investigating centre</i> | <i>Ethical approval obtained</i> | <i>Ethics approval details</i>                                                                                                                                     | <i>National, EudraCT or ClinicalTrials.gov Identifier</i> |
|-----------------------------|----------------------------------|--------------------------------------------------------------------------------------------------------------------------------------------------------------------|-----------------------------------------------------------|
| <i>UKW</i>                  | 9 <sup>th</sup> May 2019         | Approved by the National Ethics Committee                                                                                                                          | EudraCT: 2019-002244-25                                   |
| <i>UMR</i>                  | 14 <sup>th</sup> May 2019        | Approved by the National Ethics Committee                                                                                                                          | EudraCT: 2019-002244-25                                   |
| <i>IUCT-O</i>               | 16 <sup>th</sup> Dec 2019        | Approved by the National Ethics Committee                                                                                                                          | ID RCB : 2019-A01734-53                                   |
| <i>RMH/ICR</i>              | 19 <sup>th</sup> March 2020      | The study was approved by the East Midlands - Nottingham 1 Research Ethics Committee (20/EM/0022) and the institutional review board at the Royal Marsden Hospital | ClinicalTrials.gov: NCT04391244                           |

Supplementary Table 2: Acquisition parameters used for <sup>131</sup>I imaging as part of the MEDIRAD WP3 study.

| <i><sup>131</sup>I acquisition protocol</i> |                                                               |
|---------------------------------------------|---------------------------------------------------------------|
| <i>Collimator</i>                           | High Energy                                                   |
| <i>Photopeak energy window</i>              | 364 keV ± 10% or ± 15%                                        |
| <i>SPECT(/CT) Matrix</i>                    | 128 x 128                                                     |
| <i>SPECT movement</i>                       | Body contour                                                  |
| <i>Projections</i>                          | 2 x 30 (6° projection) or 2 x 36 (5° projection)              |
| <i>Time per projection</i>                  | Adjusted based on measured count-rate for patient acquisition |
| <i>CT</i>                                   | Standard low-dose protocol (if applicable)                    |

**Supplementary Table 3: SPECT (/CT) reconstruction parameters used for  $^{131}\text{I}$  imaging as part of the MEDIRAD WP3 study.**

| <i><math>^{131}\text{I}</math> reconstruction protocol</i> |                                                               |
|------------------------------------------------------------|---------------------------------------------------------------|
| <i>Reconstruction</i>                                      | OSEM (4 iterations, 10 subsets)                               |
| <i>Attenuation correction (AC)</i>                         | CTAC (One centre: Chang with $0.11\text{ cm}^{-1}$ @ 364 keV) |
| <i>Scatter correction</i>                                  | Triple-Energy Window (TEW)                                    |
| <i>Post-reconstruction filtering</i>                       | None                                                          |
